# Supplementary material for: Graphene nanoribbons hybridized carbon nanofibers: remarkably enhanced graphitization and conductivity, and excellent performance as support material for fuel cell catalysts
Source: Royal Society of Chemistry journal article supplement (doi:10.1039/c3nr04663j), 2013-10-31
Supplement: c3nr04663j.pdf [file c3nr04663j.pdf]

*Electronic Supplementary Information*

**Graphene nanoribbons hybridized carbon nanofibers: remarkably enhanced graphitization and conductivity, and excellent performance as support material for fuel cell catalysts**

*Chaonan Wang<sup>a</sup>, Hongrong Gao<sup>a</sup>, Hong Li<sup>a</sup>, Yiren Zhang<sup>a</sup>, Bowen Huang<sup>a</sup>, Junhong Zhao<sup>b</sup>, Yan Zhu<sup>a</sup>, Wang Zhang Yuan<sup>\*a</sup> and Yongming Zhang<sup>\*a</sup>*

<sup>a</sup> *School of Chemistry and Chemical Engineering, Shanghai Jiao Tong University, Shanghai 200240, China*

<sup>b</sup> *School of Chemistry and Chemical Engineering, Anyang Normal University, Anyang 455000, China*

*\* Corresponding author: wzhyuan@sjtu.edu.cn (W.Z.Y.), ymzsztu@gmail.com (Y.Z.).*

**Experimental Section**

**Materials.** MWCNTs (Purity, gt. 95%; length: 10  $\mu\text{m}$ ; diameter: gt. 50 nm) were purchased from Chengdu Organic Chemicals (Chengdu, China). Before use, they were pretreated in 6 M  $\text{HNO}_3$  for 3 h, then washed with deionized water (DIW) and dried in vacuum at room temperature for 24 h. polyacrylonitrile (PAN),  $\text{H}_2\text{PtCl}_6 \cdot 6\text{H}_2\text{O}$  (Pt, 38%), and commercial Pt/XC72R catalyst were obtained from J&K Technology Ltd., Kunming Boren Precious Metals Co. Ltd. and Johnson Matthey (JM)

Catalysts Corporation, respectively. Electrodes were supplied by Shanghai Chenhua Instrument Co., Ltd. Concentrated sulfur acid (95-98%), dimethyl formamide (DMF), potassium permanganate (KMnO<sub>4</sub>), hydrogen peroxide (H<sub>2</sub>O<sub>2</sub>, 30%), sodium borohydride (NaBH<sub>4</sub>), methanol and concentrated hydrochloric acid were provided by Sinopharm Chemical Reagent Co., Ltd. (SCRC, China) and used as received.

**Apparatus.** Transmission electron microscopy (TEM) and scanning electron microscopy (SEM) morphologies were observed by a JEOL2100F and a JSM-6701F (both from Japan Electron Optics Laboratory Co., Ltd.), respectively. IR spectra were recorded on a Perkin-Elmer Paragon 1000PC spectrometer. Raman spectra were taken from a Jobin Yvon Micro-Raman Spectroscopy (RamLab-010), equipped with a holographic grating of 1800 lines/mm and a He-Ne laser (532 nm) as the excitation source. Powder X-ray diffraction (XRD) experiments were conducted on a D/max-2200/PC (Japan Rigaku Corp.) using CuK $\alpha$  radiation (1.5418 Å). The size of Pt nanoparticles (NPs) was roughly calculated according to the Scherrer's equation ( $D = \frac{0.89\lambda}{B \cos \theta}$ ) using the typical Pt (2 2 0) peak.

**Preparation of graphene oxidation nanoribbons (GONRs).** GONRs was prepared according to Tour's method.<sup>[1]</sup> Firstly, 0.1 g of MWCNTs was suspended in 10 ml of H<sub>2</sub>SO<sub>4</sub> under vigorous stirring for 2 h. Then, 0.4 g of KMnO<sub>4</sub> was slowly added into the suspension. After stirring at room temperature for 1 h and at 80 °C for another hour, the mixture was poured into 400 ml of DIW. Afterwards, 2 ml of H<sub>2</sub>O<sub>2</sub> (30%) was added to the mixture, which was subsequently centrifuged and washed with HCl (3.3%) aqueous solution and DIW successively for several times. Finally, the obtained GONRs were dried in vacuum at 50 °C for 8 h.

***Fabrication of graphene nanoribbons-carbon nanofibers (G-CNFs).*** The GONR-PAN precursor was first prepared by electrospinning. Certain amount of GONRs were dissolved in 10 ml of DMF and sonicated at room temperature for 0.5 h. Then 1 g of PAN was added and the mixture was stirred to achieve a viscous homogeneous solution. The electrospinning conditions were set as below: a DC voltage of 18 kv, a tip-collector distance of 12 cm, a relative humidity of 35% and a feed rate of 0.2 ml/h. The nanofibers were collected and dried at 60 °C for 12 h in vacuum. The obtained GONR-PAN nanofibers were preoxidized at 280 °C in air for 5 h, and further carbonized at 900 °C for 3 h in argon atmosphere to yield the resulting G-CNF composite. By changing the weight ratios of GONRs to PAN, the composite films denoted as CNF, G<sub>0.5</sub>-CNF, G<sub>1</sub>-CNF, G<sub>2</sub>-CNF, G<sub>3</sub>-CNF and G<sub>5</sub>-CNF with GNRs of 0, 0.5, 1, 2, 3 and 5 wt% were produced, respectively. During the carbonation process, GONRs were reduced into GNRs via a carbothermic process. MWCNTs-embedded carbon nanofibers (M<sub>2</sub>-CNFs, with 2 wt% MWCNTs) were also prepared according the above procedure.

***Synthesis of Pt/G<sub>2</sub>-CNF and Pt/M<sub>2</sub>-CNF hybrid catalysts.*** Pt NPs were deposited on composite CNFs via a chemical reduction process. Taking the preparation of Pt/G<sub>2</sub>-CNF for example, 100 ml of G<sub>2</sub>-CNF (1 mg/ml) aqueous dispersion was prepared by ultrasonification, into which H<sub>2</sub>PtCl<sub>6</sub> aqueous solution (4 mg/ml) was dropped under nitrogen. Then 100 ml of NaBH<sub>4</sub> (1 mg/ml) was added dropwise. After stirring for 3 h and standing for 5 h, the resulting Pt/G<sub>2</sub>-CNF (28 wt% Pt) hybrids were filtrated and washed with DIW for several times. The resulting product was dried in vacuum at 50 °C for 10 h. For comparison, Pt/M<sub>2</sub>-CNF, Pt/CNF (28 wt% Pt) and Pt/G<sub>2</sub>-CNF (40) (40 wt% Pt) were prepared with the similar procedure.

***Electronic conductivity measurement.*** Electronic conductivity of the carbon nanofiber membranes in tangent direction was measured with a two-electrode AC impedance method by using an Autolab

PGSTA302 electrochemical test system (Eco Chemie, Netherland) at room temperature. Electronic conductivity ( $\sigma$ ) was calculated from impedance data as follows:

$$\sigma = \frac{L}{R \cdot A}$$

where  $L$  is the distance between two electrodes,  $A$  is the cross-sectional area of the sample, and  $R$  is the resistance of hybrid nanofiber membrane.

**Electrochemical test.** The electrochemical measurement was carried out by a standard three-probe cell using an Autolab PGSTAT302 (Metrohm) electrochemical test system at room temperature. A glassy carbon electrode (3 mm o.d.), a platinum foil and an Ag/AgCl electrode were used as working, counter and reference electrodes, respectively. 10  $\mu$ l of the catalyst paste, which was prepared by mixing the electrocatalyst (5 mg), Nafion (5 wt%, 50  $\mu$ l) and ethanol (1 ml), was utilized. Electrochemically active surface area (ECSA) of the hybrid catalyst was calculated from cyclic voltammetry (CV) curves via the equation of  $ECSA = \frac{Q}{mC}$ .<sup>[2]</sup> The CV curves were recorded ranging from -0.25 to 1 V in 0.5 M H<sub>2</sub>SO<sub>4</sub> solution at a scan rate of 50 mV/s. The methanol electrooxidation reaction activity was detected via CV tests in 1 M CH<sub>3</sub>OH + 0.5 M H<sub>2</sub>SO<sub>4</sub> mixture solution, ranging from -0.25 to +1 V, at a scan rate of 50 mV/s. The linear sweep voltammetry (LSV) experiments were accomplished in a mixture of 0.5 M H<sub>2</sub>SO<sub>4</sub> + 1 M CH<sub>3</sub>OH at a scan rate of 5 mV/s. The chronoamperometry (CA) test was carried out in a mixture of 0.5 M H<sub>2</sub>SO<sub>4</sub> + 1 M CH<sub>3</sub>OH, the potential stepped from the open circuit potential (0.45 V). After 2 s, the potential was stepped to 0.35 V for 2 s, and then to 0.4 V for 1800 s. High-purity nitrogen was bubbled during all the tests.

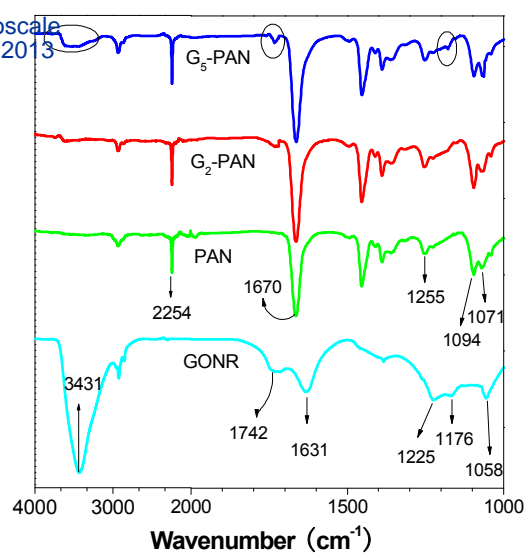

**Fig. S1** ATIR spectra of GONRs and the electrospun nanofibers of PAN, G<sub>2</sub>-PAN and G<sub>5</sub>-PAN.

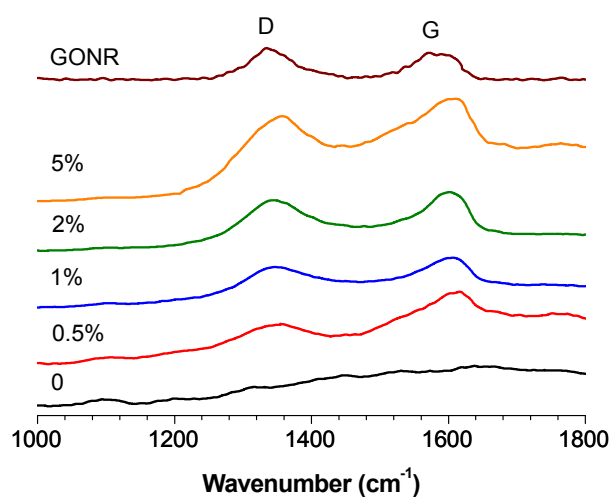

**Fig. S2** Raman spectra of the electrospun nanofibers of pure PAN, G<sub>0.5</sub>-PAN, G<sub>1</sub>-PAN, G<sub>2</sub>-PAN, G<sub>5</sub>-PAN and pure GNR membrane.

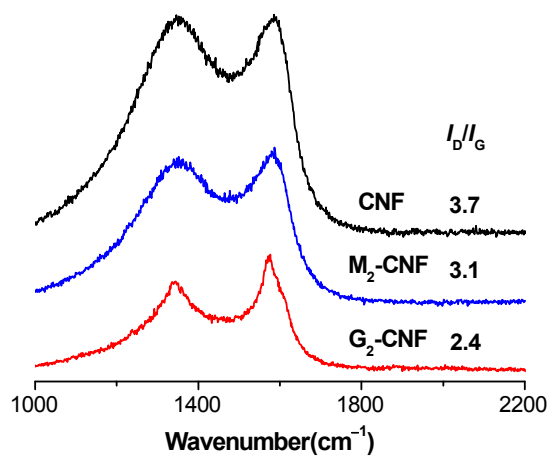

**Fig. S3** Raman spectra of the carbonization nanofibers of CNFs, M<sub>2</sub>-CNFs and G<sub>2</sub>-CNF.

### References

1. D. V. Kosynkin, L. Amanda, S. Alexander, J. R. Lomeda, D. Ayrat, P. B. Katherine and J. M. Tour, *Nature*, 2009, **458**, 872-876.
2. A. Halder, S. Sharma, M. S. Hegde and N. Ravishankar, *J. Phys. Chem. C*, 2009, **113**, 1466–1473.
